# Supplementary material for: Evidence of half-metallicity at the BiFeO3(001) surface
Source: Royal Society of Chemistry journal article supplement (doi:10.1039/d2nj06169d), 2023-01-01
Supplement: d2nj06169d2.pdf [file d2nj06169d2.pdf]

### Electronic Supplementary Information(ESI) of "Evidence of Half-metallicity at the BiFeO<sub>3</sub> (001) surface"

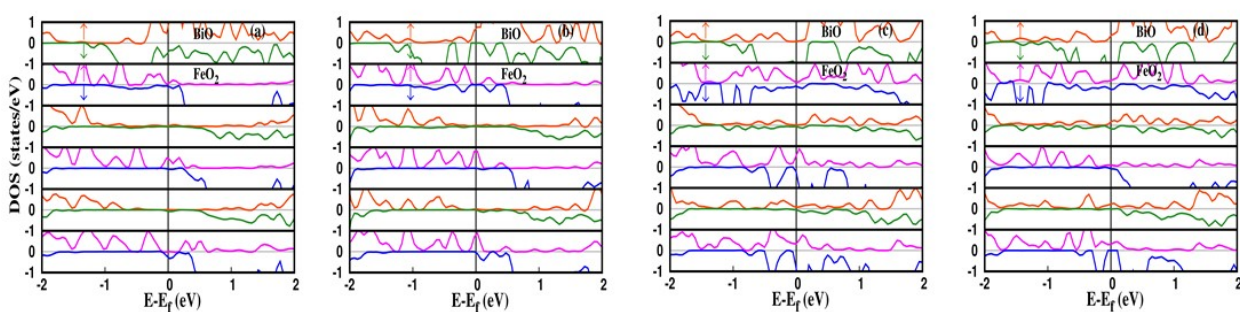

Fig. 1 Density of states (DOS) of 4L slab-thicknesses with BiO termination for (a) structure-I, (b) structure-II, (c) structure-III, and (d) structure-IV respectively.

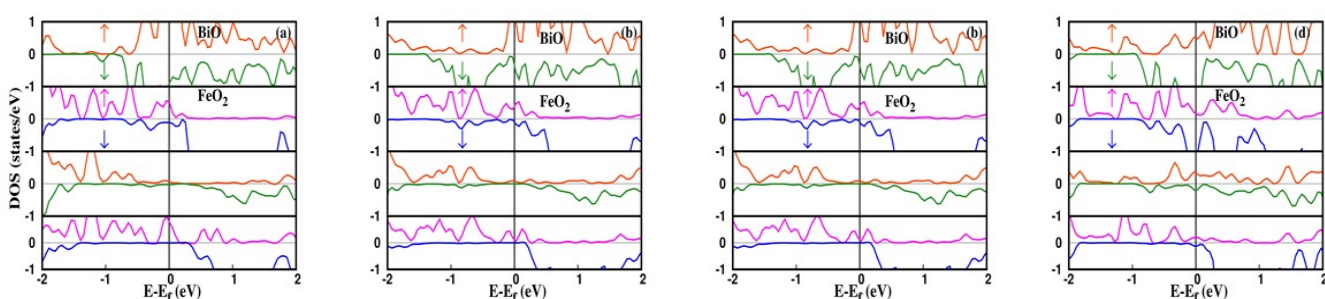

Fig. 2 Layered density of states (DOS) of 6L surface-thicknesses with BiO termination (a) structure-I, (b) structure-II, (c) structure-III, and (d) structure-IV respectively.

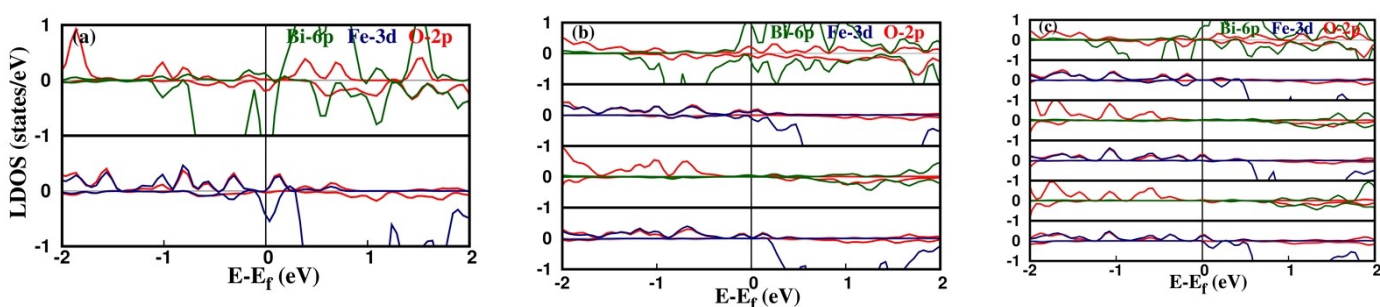

Fig. 3 Local density of states (LDOS) of structure-II with BiO terminated surface thickness of (a) 2L, (b) 4L and (c) 6L respectively.

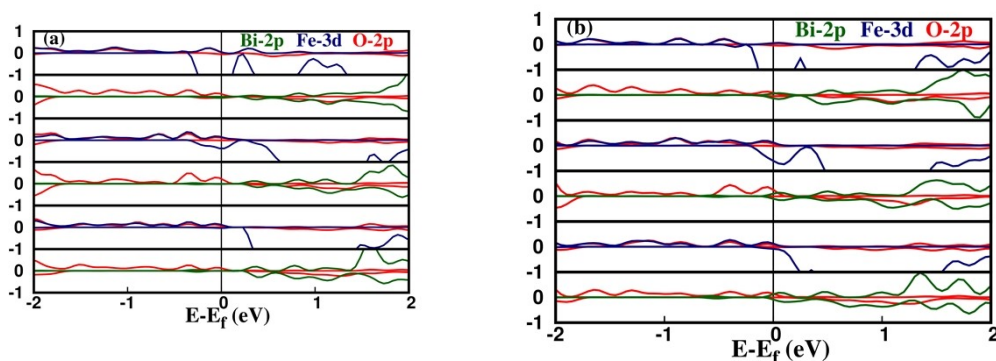

Fig. 4 Local density of states (LDOS) of 6L slab-thicknesses with FeO<sub>2</sub> termination for (a) structure-III and (b) structure-IV respectively.
