# Supplementary material for: Evidence of half-metallicity at the BiFeO3(001) surface
Source: Royal Society of Chemistry journal article supplement (doi:10.1039/d2nj06169d), 2023-01-01
Supplement: d2nj06169d3.pdf [file d2nj06169d3.pdf]

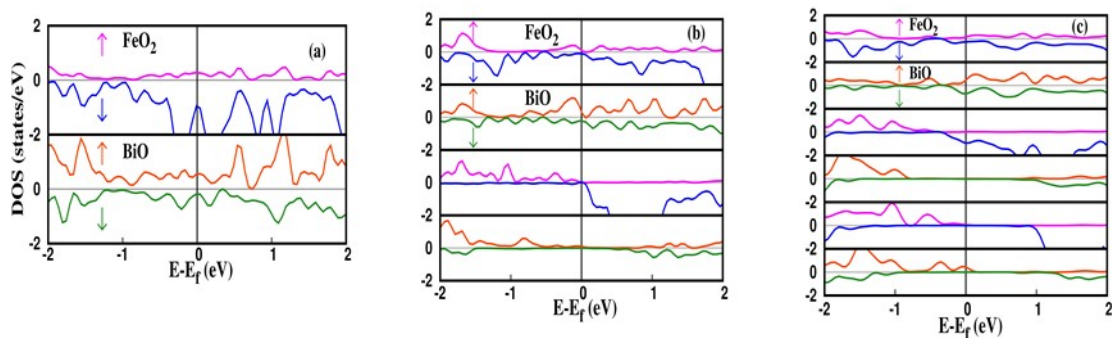

Fig. 6 Layered density of states (DOS) corresponding to Structure-II with oxygen vacancy at 'V1' site on FeO<sub>2</sub> terminated surface thickness of (a) 2L, (b) 4L and (c) 6L respectively.

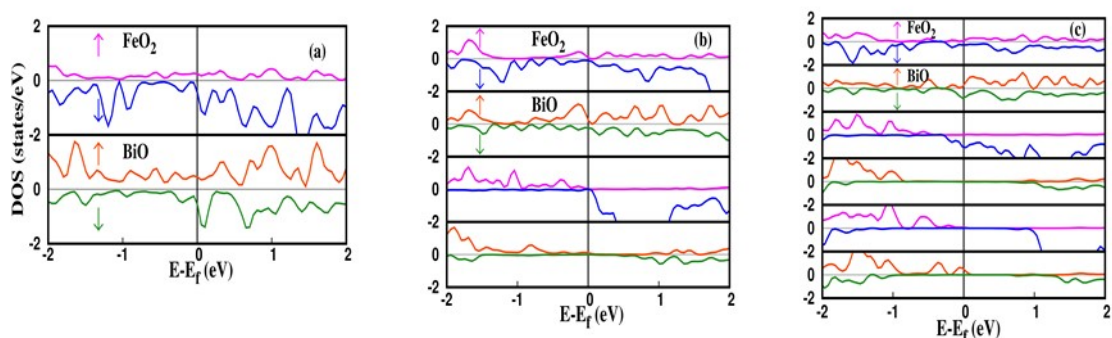

Fig. 7 Layered density of states (DOS) corresponding to Structure-II with oxygen vacancy at 'V2' site on FeO<sub>2</sub> terminated surface thickness of (a) 2L, (b) 4L and (c) 6L respectively.

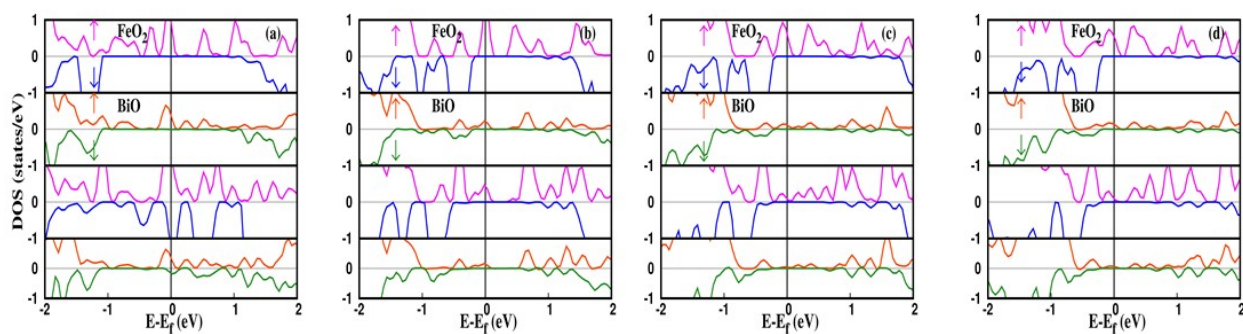

Fig. 8 Density of states (DOS) of 4L slab-thicknesses with FeO<sub>2</sub> termination for (a) structure-I, (b) structure-II, (c) structure-III, and (d) structure-IV respectively.

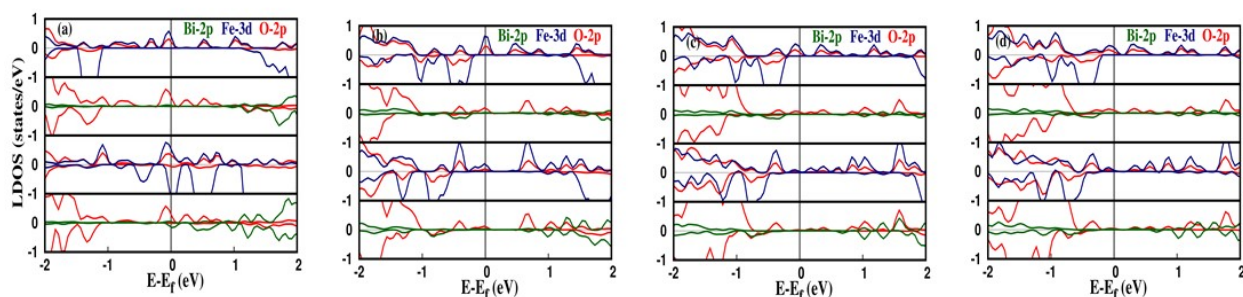

Fig. 9 Local density of states (LDOS) of 4L slab-thicknesses with FeO<sub>2</sub> termination for (a) structure-I, (b) structure-II, (c) structure-III, and (d) structure-IV respectively.
