# Supplementary material for: Evidence of half-metallicity at the BiFeO3(001) surface
Source: Royal Society of Chemistry journal article supplement (doi:10.1039/d2nj06169d), 2023-01-01
Supplement: d2nj06169d4.pdf [file d2nj06169d4.pdf]

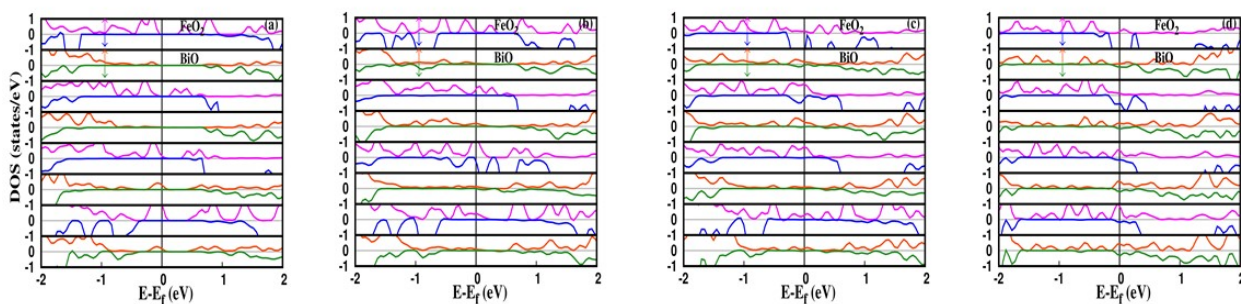

Fig. 10 Density of states (DOS) of 8L slab-thicknesses with FeO<sub>2</sub> termination for (a) structure-I, (b) structure-II, (c) structure-III, and (d) structure-IV respectively.

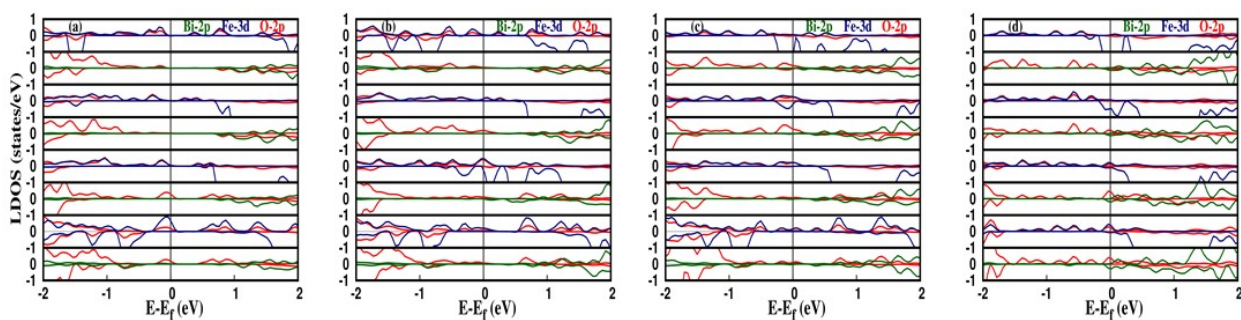

Fig. 11 Local density of states(LDOS) of 8L slab-thicknesses with FeO<sub>2</sub> termination for (a) structure-I, (b) structure-II, (c) structure-III, and (d) structure-IV respectively.
